# Supplementary material for: AI-powered spatial cell phenomics enhances risk stratification in non-small cell lung cancer
Source: Springer Nature journal article supplement (doi:10.1038/s41467-025-65783-z), 2025-11-03
Supplement: MOESM2 [file 41467_2025_65783_MOESM2_ESM.pdf › 41467_2025_65783_MOESM2_ESM.pdf]

## **Description of Additional Supplementary Files**

File Name: Supplementary Data 1

Description: Clinico-pathological characteristics of the lung cohort.

File Name: Supplementary Data 2

Description: Cell phenotype definition.

File Name: Supplementary Data 3

Description: LUAD: Phenotypes per cluster, mean density\_log.

File Name: Supplementary Data 4

Description: LUAD: Phenotypes per cluster, mean density.

File Name: Supplementary Data 5

Description: LUSC: Phenotypes per cluster, mean density\_log.

File Name: Supplementary Data 6

Description: LUSC: Phenotypes per cluster, mean density.

File Name: Supplementary Data 7

Description: Mutational landscape of the lung cohort.
