# Supplementary material for: AI-powered spatial cell phenomics enhances risk stratification in non-small cell lung cancer
Source: Nat Commun. 2025 Nov 3;16:9701. doi: 10.1038/s41467-025-65783-z (PMC12583542; doi:10.1038/s41467-025-65783-z)
Supplement: Supplementary file 3 — Supplementary Data [file 41467_2025_65783_MOESM3_ESM.xlsx]

## Sheet: Suppl. Data 1
		Berlin						Cologne
		LUAD		LUSC		ASC		LUAD		LUSC		ASC
	Characteristic	No.	%	No.	%	No.	%	No.	%	No.	%	No.	%	P-value
	ECOG
	0	197	16.9	105	8.98973	6	0.513699	193	16.524	179	15.3253	1	0.0856164	7.959E-47****
	1	154	13.2	104	8.90411	9	0.770548	5	0.428082	3	0.256849	0	0
	2	19	1.6	20	1.71233	0	0	1	0.0856164	0	0	0	0
	3	2	0.2	3	0.256849	0	0	0	0	0	0	0	0
	Missing	102	8.7	59	5.05137	6	0.513699	0	0	0	0	0	0
	Sex
	Female	218	18.7	75	6.42123	11	0.941781	90	7.70548	44	3.76712	0	0	3.215E-10****
	Male	256	21.9	216	18.4932	10	0.856164	109	9.33219	138	11.8151	1	0.0856164
	Smoking status
	Smoker	178	15.2397	107	9.16096	7	0.599315	40	3.42466	29	2.48288	0	0	<0.020*
	Non-smoker	172	14.726	108	9.24658	7	0.599315	27	2.31164	29	2.48288	0	0
	Never-smoker	45	3.85274	11	0.941781	3	0.256849	12	1.0274	1	0.0856164	0	0
	Missing	79	6.7637	65	5.56507	4	0.342466	120	10.274	123	10.5308	1	0.0856164
	Age at diagnosis (years)
	Mean (SD)	68.42 (9.42)		67.18 (8.93)		68.42 (10.12)		64.50 (9.70)		68.89 (8.21)		75.08
	Median (Min; Max)	64.95 (41.81; 85.85)		68.11 (44.10; 86.56)		69.81 (43.91; 81.28)		64.55 (37.55; 86.88)		70.14 (51.04; 90.11)		75.08 (75.08; 75.08)
	Tumor grade
	1	50	4.28082	1	0.0856164	0	0	3	0.256849	0	0	0	0	1.240E-14****
	2	237	20.2911	150	12.8425	8	0.684932	126	10.7877	88	7.53425	0	0
	3	125	10.7021	96	8.21918	9	0.770548	63	5.39384	86	7.36301	1	0.0856164
	Missing	62	5.30822	44	3.76712	4	0.342466	7	0.599315	8	0.684932	0	0
	T
	0	1	0.0856164	2	0.171233	0	0	0	0	0	0	0	0	4.891E-06****
	1	197	16.8664	93	7.96233	5	0.428082	103	8.81849	58	4.96575	0	0
	2	160	13.6986	77	6.59247	9	0.770548	56	4.79452	69	5.90753	0	0
	3	71	6.07877	70	5.99315	2	0.171233	25	2.14041	36	3.08219	0	0
	4	45	3.85274	48	4.10959	5	0.428082	15	1.28425	19	1.62671	1	0.0856164
	Missing	0	0	1	0.0856164	0	0	0	0	0	0	0	0
	N
	0	307	26.2842	170	14.5548	12	1.0274	121	10.3596	126	10.7877	1	0.0856164	3.296E-05****
	1	58	4.96575	80	6.84932	2	0.171233	38	3.25342	34	2.91096	0	0
	2	87	7.44863	32	2.73973	7	0.599315	37	3.16781	17	1.45548	0	0
	3	7	0.599315	4	0.342466	0	0	1	0.0856164	0	0	0	0
	Missing	15	1.28425	5	0.428082	0	0	2	0.171233	5	0.428082	0	0
	L
	0	380	32.5342	235	20.1199	15	1.28425	142	12.1575	137	11.7295	1	0.0856164	0.096
	1	94	8.04795	55	4.7089	6	0.513699	57	4.88014	44	3.76712	0	0
	Missing	0	0	1	0.0856164	0	0	0	0	1	0.0856164	0	0
	V
	0	427	36.5582	259	22.1747	19	1.62671	183	15.6678	153	13.0993	1	0.0856164	0.281
	1	47	4.02397	31	2.65411	2	0.171233	16	1.36986	28	2.39726	0	0
	Missing	0	0	1	0.0856164	0	0	0	0	1	0.0856164	0	0
	R
	0	439	37.5856	259	22.1747	19	1.62671	183	15.6678	170	14.5548	1	0.0856164	0.765
	1	35	2.99658	31	2.65411	2	0.171233	16	1.36986	12	1.0274	0	0
	2	0	0	1	0.0856164	0	0	0	0	0	0	0	0
	Missing	0	0	0	0	0	0	0	0	0	0	0	0
	UICC8 stage
	1	225	19.2637	109	9.33219	9	0.770548	89	7.61986	87	7.44863	0	0	4.662E-08****
	2	78	6.67808	83	7.10616	3	0.256849	51	4.36644	52	4.45205	0	0
	3	105	8.98973	83	7.10616	8	0.684932	50	4.28082	40	3.42466	1	0.0856164
	4	66	5.65068	16	1.36986	1	0.0856164	9	0.770548	3	0.256849	0	0
	TTF-1 status
	positive	359	30.7363	0	0	11	0.941781	129	11.0445	0	0	0	0	2.440E-181****
	negative	56	4.79452	291	24.9144	9	0.770548	23	1.96918	182	15.5822	1	0.0856164
	Missing	59	5.05137	0	0	1	0.0856164	47	4.02397	0	0	0	0
	Overall survival (months)
	Mean (SD)	57.58 (43.42)		47.63 (38.82)		25.05 (19.53)		39.51 (25.82)		33.94 (26.74)		1.71
	Median (Min; Max)	49.49 (0.00; 186.06)		38.20 (0.56; 171.47)		16.83 (0.23; 75.97)		36.09 (0.82; 110.82)		28.96 (0.16; 107.69)		1.71 (1.71; 1.71)
	Chemotherapy (adjuvant)
	Yes	165	14.1267	87	7.44863	7	0.599315	59	5.05137	28	2.39726	0	0	3.238E-04***
	No	309	26.4555	204	17.4658	14	1.19863	138	11.8151	150	12.8425	1	0.0856164
	Missing	0	0	0	0	0	0	2	0.171233	4	0.342466	0	0
	Supplementary Data 1: Clinico-pathological characteristics of the lung cohort.
	Statistical analysis was performed using two-sided Chi-Square tests.
	Abbreviations: ECOG, Eastern Cooperative Oncology Group performance status; L, lymphatic invasion status; LUAD, lung adenocarcinoma; LUSC, lung squamous cell carcinoma;
	max, maximum; min, minimum; N, nodal status; R, resection status; SD, standard deviation; T, tumor status; TTF-1, thyroid transcription factor-1;
	UICC8, Union for International Cancer Control, 8th edition; V, vascular invasion status.
	* = p < 0.05; ** = p < 0.01; *** = p < 0.001; **** = p < 0.0001.

## Sheet: Suppl. Data 2
	medium-grained cell phenotypes			fine-grained cell phenotypes			marker
	Number	Cell phenotype	Cell phenotype (abbreviation)	Number	Cell phenotype	Cell phenotype (abbreviation)	CK	CD3	CD4	CD8	FOXP3	CD56	Granzyme B	CD20	CD68	CD163	PD-L1	PD-1
	1	Carcinoma cell	CC	1	CD56- carcinoma cell	CC	(+)	(-)	(-)	(-)	(-)	(-)	(-)	(-)	(-)	(-)	(-)	(-)
	1	Carcinoma cell	CC	2	CD56+ carcinoma cell	CC56	(+)	(-)	(-)	(-)	(-)	(+)	(-)	(-)	(-)	(-)	(-)	(-)
	2	Immunosuppressing carcinoma cell	iCC	3	CD56- immunosuppressing carcinoma cell	iCC	(+)	(-)	(-)	(-)	(-)	(-)	(-)	(-)	(-)	(-)	(+)	(-)
	2	Immunosuppressing carcinoma cell	iCC	4	CD56+ immunosuppressing carcinoma cell	iCC56	(+)	(-)	(-)	(-)	(-)	(+)	(-)	(-)	(-)	(-)	(+)	(-)
	3	CD3 T-cell	CD3T	5	Double negative T-cell	CD3T	(-)	(+)	(-)	(-)	(-)	(-)	(-)	(-)	(-)	(-)	(-)	(-)
	3	CD3 T-cell	CD3T	5	Double negative T cell	CD3T	(-)	(+)	(-)	(-)	(-)	(+)	(-)	(-)	(-)	(-)	(-)	(-)
	4	Helper T cell	Th	6	Helper T cell	Th	(-)	(+)	(+)	(-)	(-)	(-)	(-)	(-)	(-)	(-)	(-)	(-)
	4	Helper T cell	Th	6	Helper T cell	Th	(-)	(+)	(+)	(-)	(-)	(+)	(-)	(-)	(-)	(-)	(-)	(-)
	5	CD8+ T cell	CD8T	7	CD8+ T cell	CD8T	(-)	(+)	(-)	(+)	(-)	(-)	(-)	(-)	(-)	(-)	(-)	(-)
	5	CD8+ T cell	CD8T	7	CD8+ T cell	CD8T	(-)	(+)	(-)	(+)	(-)	(+)	(-)	(-)	(-)	(-)	(-)	(-)
	6	Double positive T cell	DPT	8	Double positive T cell	DPT	(-)	(+)	(+)	(+)	(-)	(-)	(-)	(-)	(-)	(-)	(-)	(-)
	6	Double positive T cell	DPT	8	Double positive T cell	DPT	(-)	(+)	(+)	(+)	(-)	(+)	(-)	(-)	(-)	(-)	(-)	(-)
	7	Cytotoxic T cell	cTC	9	Cytotoxic CD3+ T cell	cCD3T	(-)	(+)	(-)	(-)	(-)	(-)	(+)	(-)	(-)	(-)	(-)	(-)
	7	Cytotoxic T cell	cTC	9	Cytotoxic CD3+ T cell	cCD3T	(-)	(+)	(-)	(-)	(-)	(+)	(+)	(-)	(-)	(-)	(-)	(-)
	7	Cytotoxic T cell	cTC	10	Cytotoxic CD4+ T cell	cCD4T	(-)	(+)	(+)	(-)	(-)	(+)	(+)	(-)	(-)	(-)	(-)	(-)
	7	Cytotoxic T cell	cTC	10	Cytotoxic CD4+ T cell	cCD4T	(-)	(+)	(+)	(-)	(-)	(-)	(+)	(-)	(-)	(-)	(-)	(-)
	7	Cytotoxic T cell	cTC	11	Cytotoxic CD8+ T cell	cCD8T	(-)	(+)	(-)	(+)	(-)	(-)	(+)	(-)	(-)	(-)	(-)	(-)
	7	Cytotoxic T cell	cTC	11	Cytotoxic CD8+ T cell	cCD8T	(-)	(+)	(-)	(+)	(-)	(+)	(+)	(-)	(-)	(-)	(-)	(-)
	7	Cytotoxic T cell	cTC	12	Cytotoxic double positve T cell	cDPT	(-)	(+)	(+)	(+)	(-)	(-)	(+)	(-)	(-)	(-)	(-)	(-)
	7	Cytotoxic T cell	cTC	12	Cytotoxic double positve T cell	cDPT	(-)	(+)	(+)	(+)	(-)	(+)	(+)	(-)	(-)	(-)	(-)	(-)
	8	Regulatory T cell	Treg	13	Regulatory T cell	Treg	(-)	(+)	(+)	(-)	(+)	(+)	(-)	(-)	(-)	(-)	(-)	(-)
	8	Regulatory T cell	Treg	13	Regulatory T cell	Treg	(-)	(+)	(-)	(-)	(+)	(+)	(+)	(-)	(-)	(-)	(-)	(-)
	8	Regulatory T cell	Treg	13	Regulatory T cell	Treg	(-)	(+)	(-)	(+)	(+)	(+)	(+)	(-)	(-)	(-)	(-)	(-)
	8	Regulatory T cell	Treg	13	Regulatory T cell	Treg	(-)	(+)	(-)	(+)	(+)	(+)	(-)	(-)	(-)	(-)	(-)	(-)
	8	Regulatory T cell	Treg	13	Regulatory T cell	Treg	(-)	(+)	(-)	(-)	(+)	(+)	(-)	(-)	(-)	(-)	(-)	(-)
	8	Regulatory T cell	Treg	13	Regulatory T cell	Treg	(-)	(+)	(+)	(-)	(+)	(+)	(+)	(-)	(-)	(-)	(-)	(-)
	8	Regulatory T cell	Treg	13	Regulatory T cell	Treg	(-)	(+)	(+)	(-)	(+)	(+)	(-)	(-)	(-)	(-)	(+)	(-)
	8	Regulatory T cell	Treg	13	Regulatory T cell	Treg	(-)	(+)	(-)	(+)	(+)	(+)	(-)	(-)	(-)	(-)	(+)	(-)
	8	Regulatory T cell	Treg	13	Regulatory T cell	Treg	(-)	(+)	(-)	(-)	(+)	(+)	(-)	(-)	(-)	(-)	(+)	(-)
	8	Regulatory T cell	Treg	13	Regulatory T cell	Treg	(-)	(+)	(+)	(-)	(+)	(+)	(+)	(-)	(-)	(-)	(+)	(-)
	8	Regulatory T cell	Treg	13	Regulatory T cell	Treg	(-)	(+)	(-)	(+)	(+)	(+)	(+)	(-)	(-)	(-)	(+)	(-)
	8	Regulatory T cell	Treg	13	Regulatory T cell	Treg	(-)	(+)	(-)	(-)	(+)	(+)	(+)	(-)	(-)	(-)	(+)	(-)
	8	Regulatory T cell	Treg	13	Regulatory T cell	Treg	(-)	(+)	(+)	(-)	(+)	(-)	(-)	(-)	(-)	(-)	(-)	(-)
	8	Regulatory T cell	Treg	13	Regulatory T cell	Treg	(-)	(+)	(-)	(-)	(+)	(-)	(+)	(-)	(-)	(-)	(-)	(-)
	8	Regulatory T cell	Treg	13	Regulatory T cell	Treg	(-)	(+)	(-)	(+)	(+)	(-)	(+)	(-)	(-)	(-)	(-)	(-)
	8	Regulatory T cell	Treg	13	Regulatory T cell	Treg	(-)	(+)	(-)	(+)	(+)	(-)	(-)	(-)	(-)	(-)	(-)	(-)
	8	Regulatory T cell	Treg	13	Regulatory T cell	Treg	(-)	(+)	(-)	(-)	(+)	(-)	(-)	(-)	(-)	(-)	(-)	(-)
	8	Regulatory T cell	Treg	13	Regulatory T cell	Treg	(-)	(+)	(+)	(-)	(+)	(-)	(+)	(-)	(-)	(-)	(-)	(-)
	8	Regulatory T cell	Treg	13	Regulatory T cell	Treg	(-)	(+)	(+)	(-)	(+)	(-)	(-)	(-)	(-)	(-)	(+)	(-)
	8	Regulatory T cell	Treg	13	Regulatory T cell	Treg	(-)	(+)	(-)	(+)	(+)	(-)	(-)	(-)	(-)	(-)	(+)	(-)
	8	Regulatory T cell	Treg	13	Regulatory T cell	Treg	(-)	(+)	(-)	(-)	(+)	(-)	(-)	(-)	(-)	(-)	(+)	(-)
	8	Regulatory T cell	Treg	13	Regulatory T cell	Treg	(-)	(+)	(+)	(-)	(+)	(-)	(+)	(-)	(-)	(-)	(+)	(-)
	8	Regulatory T cell	Treg	13	Regulatory T cell	Treg	(-)	(+)	(-)	(+)	(+)	(-)	(+)	(-)	(-)	(-)	(+)	(-)
	8	Regulatory T cell	Treg	13	Regulatory T cell	Treg	(-)	(+)	(-)	(-)	(+)	(-)	(+)	(-)	(-)	(-)	(+)	(-)
	9	Activated cytotoxic T cell	acTC	14	Activated cytotoxic CD4+ T cell	acCD4T	(-)	(+)	(+)	(-)	(-)	(-)	(+)	(-)	(-)	(-)	(-)	(+)
	9	Activated cytotoxic T cell	acTC	14	Activated cytotoxic CD4+ T cell	acCD4T	(-)	(+)	(+)	(-)	(-)	(+)	(+)	(-)	(-)	(-)	(-)	(+)
	9	Activated cytotoxic T cell	acTC	15	Activated cytotoxic CD8+ T cell	acCD8T	(-)	(+)	(-)	(+)	(-)	(-)	(+)	(-)	(-)	(-)	(-)	(+)
	9	Activated cytotoxic T cell	acTC	15	Activated cytotoxic CD8+ T cell	acCD8T	(-)	(+)	(-)	(+)	(-)	(+)	(+)	(-)	(-)	(-)	(-)	(+)
	9	Activated cytotoxic T cell	acTC	16	Activated cytotoxic CD3+ T cell	acCD3T	(-)	(+)	(-)	(-)	(-)	(+)	(+)	(-)	(-)	(-)	(-)	(+)
	9	Activated cytotoxic T cell	acTC	16	Activated cytotoxic CD3+ T cell	acCD3T	(-)	(+)	(-)	(-)	(-)	(-)	(+)	(-)	(-)	(-)	(-)	(+)
	9	Activated cytotoxic T cell	acTC	17	Activated cytotoxic double positve T cell	acDPT	(-)	(+)	(+)	(+)	(-)	(-)	(+)	(-)	(-)	(-)	(-)	(+)
	9	Activated cytotoxic T cell	acTC	17	Activated cytotoxic double positve T cell	acDPT	(-)	(+)	(+)	(+)	(-)	(+)	(+)	(-)	(-)	(-)	(-)	(+)
	10	Activated regulatory T cell	aTreg	18	Activated regulatory T cell	aTreg	(-)	(+)	(+)	(-)	(+)	(+)	(+)	(-)	(-)	(-)	(-)	(+)
	10	Activated regulatory T cell	aTreg	18	Activated regulatory T cell	aTreg	(-)	(+)	(-)	(+)	(+)	(+)	(+)	(-)	(-)	(-)	(-)	(+)
	10	Activated regulatory T cell	aTreg	18	Activated regulatory T cell	aTreg	(-)	(+)	(-)	(-)	(+)	(+)	(+)	(-)	(-)	(-)	(-)	(+)
	10	Activated regulatory T cell	aTreg	18	Activated regulatory T cell	aTreg	(-)	(+)	(+)	(-)	(+)	(-)	(+)	(-)	(-)	(-)	(-)	(+)
	10	Activated regulatory T cell	aTreg	18	Activated regulatory T cell	aTreg	(-)	(+)	(-)	(+)	(+)	(-)	(+)	(-)	(-)	(-)	(-)	(+)
	10	Activated regulatory T cell	aTreg	18	Activated regulatory T cell	aTreg	(-)	(+)	(-)	(-)	(+)	(-)	(+)	(-)	(-)	(-)	(-)	(+)
	11	Exhausted T-cell	exTC	19	Exhausted CD3+ T cell	exCD3T	(-)	(+)	(-)	(-)	(-)	(-)	(-)	(-)	(-)	(-)	(-)	(+)
	11	Exhausted T-cell	exTC	20	Exhausted CD3+ T cell 56	exCD3T56	(-)	(+)	(-)	(-)	(-)	(+)	(-)	(-)	(-)	(-)	(-)	(+)
	11	Exhausted T-cell	exTC	21	Exhausted helper T cell	exTh	(-)	(+)	(+)	(-)	(-)	(+)	(-)	(-)	(-)	(-)	(-)	(+)
	11	Exhausted T-cell	exTC	21	Exhausted helper T cell	exTh	(-)	(+)	(+)	(-)	(-)	(-)	(-)	(-)	(-)	(-)	(-)	(+)
	11	Exhausted T-cell	exTC	22	Exhausted CD8+ T cell	exCD8T	(-)	(+)	(-)	(+)	(-)	(-)	(-)	(-)	(-)	(-)	(-)	(+)
	11	Exhausted T-cell	exTC	22	Exhausted CD8+ T cell	exCD8T	(-)	(+)	(-)	(+)	(-)	(+)	(-)	(-)	(-)	(-)	(-)	(+)
	11	Exhausted T-cell	exTC	23	Exhausted double positive T cell	exDPT	(-)	(+)	(+)	(+)	(-)	(-)	(-)	(-)	(-)	(-)	(-)	(+)
	11	Exhausted T-cell	exTC	23	Exhausted double positive T cell	exDPT	(-)	(+)	(+)	(+)	(-)	(+)	(-)	(-)	(-)	(-)	(-)	(+)
	12	Exhausted regulatory T cell	exTreg	24	Exhausted regulatory T cell	exTreg	(-)	(+)	(+)	(-)	(+)	(+)	(-)	(-)	(-)	(-)	(-)	(+)
	12	Exhausted regulatory T cell	exTreg	24	Exhausted regulatory T cell	exTreg	(-)	(+)	(-)	(+)	(+)	(+)	(-)	(-)	(-)	(-)	(-)	(+)
	12	Exhausted regulatory T cell	exTreg	24	Exhausted regulatory T cell	exTreg	(-)	(+)	(-)	(-)	(+)	(+)	(-)	(-)	(-)	(-)	(-)	(+)
	12	Exhausted regulatory T cell	exTreg	24	Exhausted regulatory T cell	exTreg	(-)	(+)	(+)	(-)	(+)	(-)	(-)	(-)	(-)	(-)	(-)	(+)
	12	Exhausted regulatory T cell	exTreg	24	Exhausted regulatory T cell	exTreg	(-)	(+)	(-)	(+)	(+)	(-)	(-)	(-)	(-)	(-)	(-)	(+)
	12	Exhausted regulatory T cell	exTreg	24	Exhausted regulatory T cell	exTreg	(-)	(+)	(-)	(-)	(+)	(-)	(-)	(-)	(-)	(-)	(-)	(+)
	13	Immunosuppressive T cell	iTC	25	Immunosuppressive CD3+ T cell	iCD3T	(-)	(+)	(-)	(-)	(-)	(-)	(-)	(-)	(-)	(-)	(+)	(-)
	13	Immunosuppressive T cell	iTC	25	Immunosuppressive CD3+ T cell	iCD3T	(-)	(+)	(-)	(-)	(-)	(-)	(+)	(-)	(-)	(-)	(+)	(-)
	13	Immunosuppressive T cell	iTC	25	Immunosuppressive CD3+ T cell	iCD3T	(-)	(+)	(-)	(-)	(-)	(+)	(-)	(-)	(-)	(-)	(+)	(-)
	13	Immunosuppressive T cell	iTC	25	Immunosuppressive CD3+ T cell	iCD3T	(-)	(+)	(-)	(-)	(-)	(+)	(+)	(-)	(-)	(-)	(+)	(-)
	13	Immunosuppressive T cell	iTC	26	Immunosuppressive CD4+ T cell	iCD4T	(-)	(+)	(+)	(-)	(-)	(+)	(-)	(-)	(-)	(-)	(+)	(-)
	13	Immunosuppressive T cell	iTC	26	Immunosuppressive CD4+ T cell	iCD4T	(-)	(+)	(+)	(-)	(-)	(-)	(-)	(-)	(-)	(-)	(+)	(-)
	13	Immunosuppressive T cell	iTC	26	Immunosuppressive CD4+ T cell	iCD4T	(-)	(+)	(+)	(-)	(-)	(-)	(+)	(-)	(-)	(-)	(+)	(-)
	13	Immunosuppressive T cell	iTC	26	Immunosuppressive CD4+ T cell	iCD4T	(-)	(+)	(+)	(-)	(-)	(+)	(+)	(-)	(-)	(-)	(+)	(-)
	13	Immunosuppressive T cell	iTC	27	Immunosuppressive CD8+ T cell	iCD8T	(-)	(+)	(-)	(+)	(-)	(-)	(-)	(-)	(-)	(-)	(+)	(-)
	13	Immunosuppressive T cell	iTC	27	Immunosuppressive CD8+ T cell	iCD8T	(-)	(+)	(-)	(+)	(-)	(-)	(+)	(-)	(-)	(-)	(+)	(-)
	13	Immunosuppressive T cell	iTC	27	Immunosuppressive CD8+ T cell	iCD8T	(-)	(+)	(-)	(+)	(-)	(+)	(-)	(-)	(-)	(-)	(+)	(-)
	13	Immunosuppressive T cell	iTC	27	Immunosuppressive CD8+ T cell	iCD8T	(-)	(+)	(-)	(+)	(-)	(+)	(+)	(-)	(-)	(-)	(+)	(-)
	13	Immunosuppressive T cell	iTC	28	Immunosuppressive double positive T cell	iDPT	(-)	(+)	(+)	(+)	(-)	(+)	(-)	(-)	(-)	(-)	(+)	(-)
	13	Immunosuppressive T cell	iTC	28	Immunosuppressive double positive T cell	iDPT	(-)	(+)	(+)	(+)	(-)	(-)	(+)	(-)	(-)	(-)	(+)	(-)
	13	Immunosuppressive T cell	iTC	28	Immunosuppressive double positive T cell	iDPT	(-)	(+)	(+)	(+)	(-)	(-)	(-)	(-)	(-)	(-)	(+)	(-)
	13	Immunosuppressive T cell	iTC	28	Immunosuppressive double positive T cell	iDPT	(-)	(+)	(+)	(+)	(-)	(+)	(+)	(-)	(-)	(-)	(+)	(-)
	14	B cell	B	29	B cell	B	(-)	(-)	(-)	(-)	(-)	(-)	(-)	(+)	(-)	(-)	(-)	(-)
	15	Activated B cell	aB	30	Activated B cell	aB	(-)	(-)	(-)	(-)	(-)	(-)	(-)	(+)	(-)	(-)	(-)	(+)
	16	Immunosuppressive B cell	iB	31	Immunosuppressive B cell	iB	(-)	(-)	(-)	(-)	(-)	(-)	(-)	(+)	(-)	(-)	(+)	(-)
	17	Natural killer cell	NK	32	CD56 bright natural killer cell	NKbr	(-)	(-)	(-)	(-)	(-)	(+)	(-)	(-)	(-)	(-)	(-)	(-)
	17	Natural killer cell	NK	32	CD56 bright natural killer cell	NKbr	(-)	(-)	(-)	(+)	(-)	(+)	(-)	(-)	(-)	(-)	(-)	(-)
	17	Natural killer cell	NK	33	CD56 dim natural killer cell	Nkdim	(-)	(-)	(-)	(-)	(-)	(+)	(+)	(-)	(-)	(-)	(-)	(-)
	17	Natural killer cell	NK	33	CD56 dim natural killer cell	Nkdim	(-)	(-)	(-)	(+)	(-)	(+)	(+)	(-)	(-)	(-)	(-)	(-)
	18	Activated natural killer cell	aNK	34	Activated natural killer cell	aNK	(-)	(-)	(-)	(-)	(-)	(+)	(-)	(-)	(-)	(-)	(-)	(+)
	18	Activated natural killer cell	aNK	34	Activated natural killer cell	aNK	(-)	(-)	(-)	(-)	(-)	(+)	(+)	(-)	(-)	(-)	(-)	(+)
	18	Activated natural killer cell	aNK	34	Activated natural killer cell	aNK	(-)	(-)	(-)	(+)	(-)	(+)	(-)	(-)	(-)	(-)	(-)	(+)
	18	Activated natural killer cell	aNK	34	Activated natural killer cell	aNK	(-)	(-)	(-)	(+)	(-)	(+)	(+)	(-)	(-)	(-)	(-)	(+)
	19	Immunosuppressive natural killer cell	iNK	35	Immunosuppressive natural killer cell	iNK	(-)	(-)	(-)	(-)	(-)	(+)	(-)	(-)	(-)	(-)	(+)	(-)
	19	Immunosuppressive natural killer cell	iNK	35	Immunosuppressive natural killer cell	iNK	(-)	(-)	(-)	(-)	(-)	(+)	(+)	(-)	(-)	(-)	(+)	(-)
	19	Immunosuppressive natural killer cell	iNK	35	Immunosuppressive natural killer cell	iNK	(-)	(-)	(-)	(+)	(-)	(+)	(-)	(-)	(-)	(-)	(+)	(-)
	19	Immunosuppressive natural killer cell	iNK	35	Immunosuppressive natural killer cell	iNK	(-)	(-)	(-)	(+)	(-)	(+)	(+)	(-)	(-)	(-)	(+)	(-)
	20	Macrophage Type 1	M1	36	Macrophage Type 1	M1	(-)	(-)	(+)	(-)	(-)	(+)	(-)	(-)	(+)	(-)	(-)	(-)
	20	Macrophage Type 1	M1	36	Macrophage Type 1	M1	(-)	(-)	(+)	(+)	(-)	(+)	(-)	(-)	(+)	(-)	(-)	(-)
	20	Macrophage Type 1	M1	36	Macrophage Type 1	M1	(-)	(-)	(-)	(+)	(-)	(+)	(-)	(-)	(+)	(-)	(-)	(-)
	20	Macrophage Type 1	M1	36	Macrophage Type 1	M1	(-)	(-)	(-)	(-)	(-)	(+)	(-)	(-)	(+)	(-)	(-)	(-)
	20	Macrophage Type 1	M1	36	Macrophage Type 1	M1	(-)	(-)	(+)	(-)	(-)	(-)	(-)	(-)	(+)	(-)	(-)	(-)
	20	Macrophage Type 1	M1	36	Macrophage Type 1	M1	(-)	(-)	(+)	(+)	(-)	(-)	(-)	(-)	(+)	(-)	(-)	(-)
	20	Macrophage Type 1	M1	36	Macrophage Type 1	M1	(-)	(-)	(-)	(+)	(-)	(-)	(-)	(-)	(+)	(-)	(-)	(-)
	20	Macrophage Type 1	M1	36	Macrophage Type 1	M1	(-)	(-)	(-)	(-)	(-)	(-)	(-)	(-)	(+)	(-)	(-)	(-)
	21	Macrophage Type 2	M2	37	Macrophage Type 2	M2	(-)	(-)	(+)	(-)	(-)	(+)	(-)	(-)	(+)	(+)	(-)	(-)
	21	Macrophage Type 2	M2	37	Macrophage Type 2	M2	(-)	(-)	(+)	(-)	(-)	(+)	(-)	(-)	(-)	(+)	(-)	(-)
	21	Macrophage Type 2	M2	37	Macrophage Type 2	M2	(-)	(-)	(+)	(+)	(-)	(+)	(-)	(-)	(+)	(+)	(-)	(-)
	21	Macrophage Type 2	M2	37	Macrophage Type 2	M2	(-)	(-)	(+)	(+)	(-)	(+)	(-)	(-)	(-)	(+)	(-)	(-)
	21	Macrophage Type 2	M2	37	Macrophage Type 2	M2	(-)	(-)	(-)	(+)	(-)	(+)	(-)	(-)	(+)	(+)	(-)	(-)
	21	Macrophage Type 2	M2	37	Macrophage Type 2	M2	(-)	(-)	(-)	(+)	(-)	(+)	(-)	(-)	(-)	(+)	(-)	(-)
	21	Macrophage Type 2	M2	37	Macrophage Type 2	M2	(-)	(-)	(-)	(-)	(-)	(+)	(-)	(-)	(+)	(+)	(-)	(-)
	21	Macrophage Type 2	M2	37	Macrophage Type 2	M2	(-)	(-)	(-)	(-)	(-)	(+)	(-)	(-)	(-)	(+)	(-)	(-)
	21	Macrophage Type 2	M2	37	Macrophage Type 2	M2	(-)	(-)	(+)	(-)	(-)	(-)	(-)	(-)	(+)	(+)	(-)	(-)
	21	Macrophage Type 2	M2	37	Macrophage Type 2	M2	(-)	(-)	(+)	(-)	(-)	(-)	(-)	(-)	(-)	(+)	(-)	(-)
	21	Macrophage Type 2	M2	37	Macrophage Type 2	M2	(-)	(-)	(+)	(+)	(-)	(-)	(-)	(-)	(+)	(+)	(-)	(-)
	21	Macrophage Type 2	M2	37	Macrophage Type 2	M2	(-)	(-)	(+)	(+)	(-)	(-)	(-)	(-)	(-)	(+)	(-)	(-)
	21	Macrophage Type 2	M2	37	Macrophage Type 2	M2	(-)	(-)	(-)	(+)	(-)	(-)	(-)	(-)	(+)	(+)	(-)	(-)
	21	Macrophage Type 2	M2	37	Macrophage Type 2	M2	(-)	(-)	(-)	(+)	(-)	(-)	(-)	(-)	(-)	(+)	(-)	(-)
	21	Macrophage Type 2	M2	37	Macrophage Type 2	M2	(-)	(-)	(-)	(-)	(-)	(-)	(-)	(-)	(+)	(+)	(-)	(-)
	21	Macrophage Type 2	M2	37	Macrophage Type 2	M2	(-)	(-)	(-)	(-)	(-)	(-)	(-)	(-)	(-)	(+)	(-)	(-)
	22	Immunosuppressive macrophage Type 1	iM1	38	Macrophage Type 1 PD1+	M1_PD1+	(-)	(-)	(+)	(-)	(-)	(+)	(-)	(-)	(+)	(-)	(-)	(+)
	22	Immunosuppressive macrophage Type 1	iM1	38	Macrophage Type 1 PD1+	M1_PD1+	(-)	(-)	(+)	(+)	(-)	(+)	(-)	(-)	(+)	(-)	(-)	(+)
	22	Immunosuppressive macrophage Type 1	iM1	38	Macrophage Type 1 PD1+	M1_PD1+	(-)	(-)	(-)	(+)	(-)	(+)	(-)	(-)	(+)	(-)	(-)	(+)
	22	Immunosuppressive macrophage Type 1	iM1	38	Macrophage Type 1 PD1+	M1_PD1+	(-)	(-)	(-)	(-)	(-)	(+)	(-)	(-)	(+)	(-)	(-)	(+)
	22	Immunosuppressive macrophage Type 1	iM1	38	Macrophage Type 1 PD1+	M1_PD1+	(-)	(-)	(+)	(-)	(-)	(-)	(-)	(-)	(+)	(-)	(-)	(+)
	22	Immunosuppressive macrophage Type 1	iM1	38	Macrophage Type 1 PD1+	M1_PD1+	(-)	(-)	(+)	(+)	(-)	(-)	(-)	(-)	(+)	(-)	(-)	(+)
	22	Immunosuppressive macrophage Type 1	iM1	38	Macrophage Type 1 PD1+	M1_PD1+	(-)	(-)	(-)	(+)	(-)	(-)	(-)	(-)	(+)	(-)	(-)	(+)
	22	Immunosuppressive macrophage Type 1	iM1	38	Macrophage Type 1 PD1+	M1_PD1+	(-)	(-)	(-)	(-)	(-)	(-)	(-)	(-)	(+)	(-)	(-)	(+)
	22	Immunosuppressive macrophage Type 1	iM1	39	Macrophage Type 2 PD1+	M2_PD1+	(-)	(-)	(+)	(-)	(-)	(+)	(-)	(-)	(+)	(+)	(-)	(+)
	22	Immunosuppressive macrophage Type 1	iM1	39	Macrophage Type 2 PD1+	M2_PD1+	(-)	(-)	(+)	(-)	(-)	(+)	(-)	(-)	(-)	(+)	(-)	(+)
	22	Immunosuppressive macrophage Type 1	iM1	39	Macrophage Type 2 PD1+	M2_PD1+	(-)	(-)	(+)	(+)	(-)	(+)	(-)	(-)	(+)	(+)	(-)	(+)
	22	Immunosuppressive macrophage Type 1	iM1	39	Macrophage Type 2 PD1+	M2_PD1+	(-)	(-)	(+)	(+)	(-)	(+)	(-)	(-)	(-)	(+)	(-)	(+)
	22	Immunosuppressive macrophage Type 1	iM1	39	Macrophage Type 2 PD1+	M2_PD1+	(-)	(-)	(-)	(+)	(-)	(+)	(-)	(-)	(+)	(+)	(-)	(+)
	22	Immunosuppressive macrophage Type 1	iM1	39	Macrophage Type 2 PD1+	M2_PD1+	(-)	(-)	(-)	(+)	(-)	(+)	(-)	(-)	(-)	(+)	(-)	(+)
	22	Immunosuppressive macrophage Type 1	iM1	39	Macrophage Type 2 PD1+	M2_PD1+	(-)	(-)	(-)	(-)	(-)	(+)	(-)	(-)	(+)	(+)	(-)	(+)
	22	Immunosuppressive macrophage Type 1	iM1	39	Macrophage Type 2 PD1+	M2_PD1+	(-)	(-)	(-)	(-)	(-)	(+)	(-)	(-)	(-)	(+)	(-)	(+)
	22	Immunosuppressive macrophage Type 1	iM1	39	Macrophage Type 2 PD1+	M2_PD1+	(-)	(-)	(+)	(-)	(-)	(-)	(-)	(-)	(+)	(+)	(-)	(+)
	22	Immunosuppressive macrophage Type 1	iM1	39	Macrophage Type 2 PD1+	M2_PD1+	(-)	(-)	(+)	(-)	(-)	(-)	(-)	(-)	(-)	(+)	(-)	(+)
	22	Immunosuppressive macrophage Type 1	iM1	39	Macrophage Type 2 PD1+	M2_PD1+	(-)	(-)	(+)	(+)	(-)	(-)	(-)	(-)	(+)	(+)	(-)	(+)
	22	Immunosuppressive macrophage Type 1	iM1	39	Macrophage Type 2 PD1+	M2_PD1+	(-)	(-)	(+)	(+)	(-)	(-)	(-)	(-)	(-)	(+)	(-)	(+)
	22	Immunosuppressive macrophage Type 1	iM1	39	Macrophage Type 2 PD1+	M2_PD1+	(-)	(-)	(-)	(+)	(-)	(-)	(-)	(-)	(+)	(+)	(-)	(+)
	22	Immunosuppressive macrophage Type 1	iM1	39	Macrophage Type 2 PD1+	M2_PD1+	(-)	(-)	(-)	(+)	(-)	(-)	(-)	(-)	(-)	(+)	(-)	(+)
	22	Immunosuppressive macrophage Type 1	iM1	39	Macrophage Type 2 PD1+	M2_PD1+	(-)	(-)	(-)	(-)	(-)	(-)	(-)	(-)	(+)	(+)	(-)	(+)
	22	Immunosuppressive macrophage Type 1	iM1	39	Macrophage Type 2 PD1+	M2_PD1+	(-)	(-)	(-)	(-)	(-)	(-)	(-)	(-)	(-)	(+)	(-)	(+)
	23	Immunosuppressive macrophage Type 2	iM2	40	Immunosuppressive macrophage Type 1	iM1	(-)	(-)	(+)	(-)	(-)	(+)	(-)	(-)	(+)	(-)	(+)	(-)
	23	Immunosuppressive macrophage Type 2	iM2	40	Immunosuppressive macrophage Type 1	iM1	(-)	(-)	(+)	(+)	(-)	(+)	(-)	(-)	(+)	(-)	(+)	(-)
	23	Immunosuppressive macrophage Type 2	iM2	40	Immunosuppressive macrophage Type 1	iM1	(-)	(-)	(-)	(+)	(-)	(+)	(-)	(-)	(+)	(-)	(+)	(-)
	23	Immunosuppressive macrophage Type 2	iM2	40	Immunosuppressive macrophage Type 1	iM1	(-)	(-)	(-)	(-)	(-)	(+)	(-)	(-)	(+)	(-)	(+)	(-)
	23	Immunosuppressive macrophage Type 2	iM2	40	Immunosuppressive macrophage Type 1	iM1	(-)	(-)	(+)	(-)	(-)	(-)	(-)	(-)	(+)	(-)	(+)	(-)
	23	Immunosuppressive macrophage Type 2	iM2	40	Immunosuppressive macrophage Type 1	iM1	(-)	(-)	(+)	(+)	(-)	(-)	(-)	(-)	(+)	(-)	(+)	(-)
	23	Immunosuppressive macrophage Type 2	iM2	40	Immunosuppressive macrophage Type 1	iM1	(-)	(-)	(-)	(+)	(-)	(-)	(-)	(-)	(+)	(-)	(+)	(-)
	23	Immunosuppressive macrophage Type 2	iM2	40	Immunosuppressive macrophage Type 1	iM1	(-)	(-)	(-)	(-)	(-)	(-)	(-)	(-)	(+)	(-)	(+)	(-)
	23	Immunosuppressive macrophage Type 2	iM2	41	Immunosuppressive macrophage Type 2	iM2	(-)	(-)	(+)	(-)	(-)	(+)	(-)	(-)	(+)	(+)	(+)	(-)
	23	Immunosuppressive macrophage Type 2	iM2	41	Immunosuppressive macrophage Type 2	iM2	(-)	(-)	(+)	(-)	(-)	(+)	(-)	(-)	(-)	(+)	(+)	(-)
	23	Immunosuppressive macrophage Type 2	iM2	41	Immunosuppressive macrophage Type 2	iM2	(-)	(-)	(+)	(+)	(-)	(+)	(-)	(-)	(+)	(+)	(+)	(-)
	23	Immunosuppressive macrophage Type 2	iM2	41	Immunosuppressive macrophage Type 2	iM2	(-)	(-)	(+)	(+)	(-)	(+)	(-)	(-)	(-)	(+)	(+)	(-)
	23	Immunosuppressive macrophage Type 2	iM2	41	Immunosuppressive macrophage Type 2	iM2	(-)	(-)	(-)	(+)	(-)	(+)	(-)	(-)	(+)	(+)	(+)	(-)
	23	Immunosuppressive macrophage Type 2	iM2	41	Immunosuppressive macrophage Type 2	iM2	(-)	(-)	(-)	(+)	(-)	(+)	(-)	(-)	(-)	(+)	(+)	(-)
	23	Immunosuppressive macrophage Type 2	iM2	41	Immunosuppressive macrophage Type 2	iM2	(-)	(-)	(-)	(-)	(-)	(+)	(-)	(-)	(+)	(+)	(+)	(-)
	23	Immunosuppressive macrophage Type 2	iM2	41	Immunosuppressive macrophage Type 2	iM2	(-)	(-)	(-)	(-)	(-)	(+)	(-)	(-)	(-)	(+)	(+)	(-)
	23	Immunosuppressive macrophage Type 2	iM2	41	Immunosuppressive macrophage Type 2	iM2	(-)	(-)	(+)	(-)	(-)	(-)	(-)	(-)	(+)	(+)	(+)	(-)
	23	Immunosuppressive macrophage Type 2	iM2	41	Immunosuppressive macrophage Type 2	iM2	(-)	(-)	(+)	(-)	(-)	(-)	(-)	(-)	(-)	(+)	(+)	(-)
	23	Immunosuppressive macrophage Type 2	iM2	41	Immunosuppressive macrophage Type 2	iM2	(-)	(-)	(+)	(+)	(-)	(-)	(-)	(-)	(+)	(+)	(+)	(-)
	23	Immunosuppressive macrophage Type 2	iM2	41	Immunosuppressive macrophage Type 2	iM2	(-)	(-)	(+)	(+)	(-)	(-)	(-)	(-)	(-)	(+)	(+)	(-)
	23	Immunosuppressive macrophage Type 2	iM2	41	Immunosuppressive macrophage Type 2	iM2	(-)	(-)	(-)	(+)	(-)	(-)	(-)	(-)	(+)	(+)	(+)	(-)
	23	Immunosuppressive macrophage Type 2	iM2	41	Immunosuppressive macrophage Type 2	iM2	(-)	(-)	(-)	(+)	(-)	(-)	(-)	(-)	(-)	(+)	(+)	(-)
	23	Immunosuppressive macrophage Type 2	iM2	41	Immunosuppressive macrophage Type 2	iM2	(-)	(-)	(-)	(-)	(-)	(-)	(-)	(-)	(+)	(+)	(+)	(-)
	23	Immunosuppressive macrophage Type 2	iM2	41	Immunosuppressive macrophage Type 2	iM2	(-)	(-)	(-)	(-)	(-)	(-)	(-)	(-)	(-)	(+)	(+)	(-)
	23	Immunosuppressive macrophage Type 2	iM2	42	Immunosuppressive macrophage Type 1 PD1+	iM1_PD1+	(-)	(-)	(+)	(-)	(-)	(+)	(-)	(-)	(+)	(-)	(+)	(+)
	23	Immunosuppressive macrophage Type 2	iM2	42	Immunosuppressive macrophage Type 1 PD1+	iM1_PD1+	(-)	(-)	(+)	(+)	(-)	(+)	(-)	(-)	(+)	(-)	(+)	(+)
	23	Immunosuppressive macrophage Type 2	iM2	42	Immunosuppressive macrophage Type 1 PD1+	iM1_PD1+	(-)	(-)	(-)	(+)	(-)	(+)	(-)	(-)	(+)	(-)	(+)	(+)
	23	Immunosuppressive macrophage Type 2	iM2	42	Immunosuppressive macrophage Type 1 PD1+	iM1_PD1+	(-)	(-)	(-)	(-)	(-)	(+)	(-)	(-)	(+)	(-)	(+)	(+)
	23	Immunosuppressive macrophage Type 2	iM2	42	Immunosuppressive macrophage Type 1 PD1+	iM1_PD1+	(-)	(-)	(+)	(-)	(-)	(-)	(-)	(-)	(+)	(-)	(+)	(+)
	23	Immunosuppressive macrophage Type 2	iM2	42	Immunosuppressive macrophage Type 1 PD1+	iM1_PD1+	(-)	(-)	(+)	(+)	(-)	(-)	(-)	(-)	(+)	(-)	(+)	(+)
	23	Immunosuppressive macrophage Type 2	iM2	42	Immunosuppressive macrophage Type 1 PD1+	iM1_PD1+	(-)	(-)	(-)	(+)	(-)	(-)	(-)	(-)	(+)	(-)	(+)	(+)
	23	Immunosuppressive macrophage Type 2	iM2	42	Immunosuppressive macrophage Type 1 PD1+	iM1_PD1+	(-)	(-)	(-)	(-)	(-)	(-)	(-)	(-)	(+)	(-)	(+)	(+)
	23	Immunosuppressive macrophage Type 2	iM2	43	Immunosuppressive macrophage Type 2 PD1+	iM2_PD1+	(-)	(-)	(+)	(-)	(-)	(+)	(-)	(-)	(+)	(+)	(+)	(+)
	23	Immunosuppressive macrophage Type 2	iM2	43	Immunosuppressive macrophage Type 2 PD1+	iM2_PD1+	(-)	(-)	(+)	(-)	(-)	(+)	(-)	(-)	(-)	(+)	(+)	(+)
	23	Immunosuppressive macrophage Type 2	iM2	43	Immunosuppressive macrophage Type 2 PD1+	iM2_PD1+	(-)	(-)	(+)	(+)	(-)	(+)	(-)	(-)	(+)	(+)	(+)	(+)
	23	Immunosuppressive macrophage Type 2	iM2	43	Immunosuppressive macrophage Type 2 PD1+	iM2_PD1+	(-)	(-)	(+)	(+)	(-)	(+)	(-)	(-)	(-)	(+)	(+)	(+)
	23	Immunosuppressive macrophage Type 2	iM2	43	Immunosuppressive macrophage Type 2 PD1+	iM2_PD1+	(-)	(-)	(-)	(+)	(-)	(+)	(-)	(-)	(+)	(+)	(+)	(+)
	23	Immunosuppressive macrophage Type 2	iM2	43	Immunosuppressive macrophage Type 2 PD1+	iM2_PD1+	(-)	(-)	(-)	(+)	(-)	(+)	(-)	(-)	(-)	(+)	(+)	(+)
	23	Immunosuppressive macrophage Type 2	iM2	43	Immunosuppressive macrophage Type 2 PD1+	iM2_PD1+	(-)	(-)	(-)	(-)	(-)	(+)	(-)	(-)	(+)	(+)	(+)	(+)
	23	Immunosuppressive macrophage Type 2	iM2	43	Immunosuppressive macrophage Type 2 PD1+	iM2_PD1+	(-)	(-)	(-)	(-)	(-)	(+)	(-)	(-)	(-)	(+)	(+)	(+)
	23	Immunosuppressive macrophage Type 2	iM2	43	Immunosuppressive macrophage Type 2 PD1+	iM2_PD1+	(-)	(-)	(+)	(-)	(-)	(-)	(-)	(-)	(+)	(+)	(+)	(+)
	23	Immunosuppressive macrophage Type 2	iM2	43	Immunosuppressive macrophage Type 2 PD1+	iM2_PD1+	(-)	(-)	(+)	(-)	(-)	(-)	(-)	(-)	(-)	(+)	(+)	(+)
	23	Immunosuppressive macrophage Type 2	iM2	43	Immunosuppressive macrophage Type 2 PD1+	iM2_PD1+	(-)	(-)	(+)	(+)	(-)	(-)	(-)	(-)	(+)	(+)	(+)	(+)
	23	Immunosuppressive macrophage Type 2	iM2	43	Immunosuppressive macrophage Type 2 PD1+	iM2_PD1+	(-)	(-)	(+)	(+)	(-)	(-)	(-)	(-)	(-)	(+)	(+)	(+)
	23	Immunosuppressive macrophage Type 2	iM2	43	Immunosuppressive macrophage Type 2 PD1+	iM2_PD1+	(-)	(-)	(-)	(+)	(-)	(-)	(-)	(-)	(+)	(+)	(+)	(+)
	23	Immunosuppressive macrophage Type 2	iM2	43	Immunosuppressive macrophage Type 2 PD1+	iM2_PD1+	(-)	(-)	(-)	(+)	(-)	(-)	(-)	(-)	(-)	(+)	(+)	(+)
	23	Immunosuppressive macrophage Type 2	iM2	43	Immunosuppressive macrophage Type 2 PD1+	iM2_PD1+	(-)	(-)	(-)	(-)	(-)	(-)	(-)	(-)	(+)	(+)	(+)	(+)
	23	Immunosuppressive macrophage Type 2	iM2	43	Immunosuppressive macrophage Type 2 PD1+	iM2_PD1+	(-)	(-)	(-)	(-)	(-)	(-)	(-)	(-)	(-)	(+)	(+)	(+)
	Supplementary Data 2: Cell phenotype definition

## Sheet: Suppl. Data 3
			Cluster
	Cell phenotype	Cell group	1	2	2	2	3	3	3	4	4	5	5	6	6	6	6
	Activated B cell	B cell	0.01	0.04	0.05	0.04	0.35	0.49	0.23	0.07	0.12	0.01	0.01	0	0.01	0.03	0.03
	Activated cytotoxic CD4+ T cell	T cell	0.18	0.05	0.29	0.6	0.33	0.11	0.39	0.4	0.46	0.16	0.04	0.02	0.12	0.35	0.26
	Activated cytotoxic CD8+ T cell	T cell	0.45	0.07	0.67	1.35	0.94	0.24	1.22	2.92	1.69	0.43	0.35	0.8	0.96	1.06	0.78
	Activated cytotoxic double negative T cell	T cell	0.26	0.07	0.34	0.67	0.42	0.16	0.52	1.05	0.72	0.21	0.05	0.14	0.31	0.51	0.37
	Activated cytotoxic double positve T cell	T cell	0.07	0.01	0.11	0.25	0.13	0.01	0.2	0.59	0.27	0.05	0.04	0.14	0.17	0.18	0.11
	Activated natural killer cell	Natural killer cell	0.17	0.12	0.16	0.26	0.16	0.06	0.13	0.04	0.19	0.13	0.1	0.03	0.08	0.21	0.18
	B cell	B cell	0.83	2.22	1.98	1.79	3.99	4.04	3.48	1.36	2.74	0.53	0.28	0.52	0.86	1.28	1.1
	CD56 bright natural killer cell	Natural killer cell	0.92	0.79	1.02	1.29	1.25	0.78	1.12	1.55	1.24	1.13	1.66	0.61	0.88	0.99	1.05
	CD56 dim natural killer cell	Natural killer cell	0.05	0.02	0.09	0.17	0.16	0.07	0.19	0.07	0.31	0.06	0.01	0.24	0.09	0.22	0.1
	CD56+ carcinoma cell	Carcinoma cell	0.49	0.22	0.39	0.58	0.45	0.21	0.45	0	0.19	0.69	2.46	0	0.31	0.17	0.63
	CD56- carcinoma cell	Carcinoma cell	6.67	6.35	6.57	6.22	5.87	6.31	5.93	0.63	4.86	6.75	6.73	1.28	4.98	5.87	6.24
	CD56- immunosuppressing carcinoma cell	Immunosuppressing carcinoma cell	1.07	0.75	0.83	2.49	1.26	2.85	3.64	3.01	5.48	0.89	0.71	5.02	6.15	4.99	4.74
	CD8+ T cell	T cell	1.39	1.47	2.12	2.8	3.37	1.31	3.34	4.82	3.64	0.71	0.39	2.6	1.29	2.01	1.74
	Cytotoxic CD4+ T cell	T cell	0.27	0.41	0.38	0.61	0.48	0.19	0.55	0.37	0.5	0.18	0.09	0.03	0.2	0.47	0.39
	Cytotoxic CD8+ T cell	T cell	0.47	0.19	0.67	1.26	1.05	0.29	1.33	3.31	1.89	0.33	0.17	1.45	0.81	0.86	0.8
	Cytotoxic double negative T cell	T cell	0.91	0.92	1.04	1.52	1.12	0.83	1.36	2.19	1.62	0.53	0.2	0.53	0.83	1.44	1.13
	Cytotoxic double positve T cell	T cell	0.05	0.01	0.08	0.15	0.11	0.01	0.15	0.44	0.25	0.02	0.03	0.19	0.11	0.08	0.08
	CD3 T-cell	T cell	3.16	4.63	3.54	3.85	4.21	3.75	4.07	4.11	3.93	1.93	1.06	2.35	1.8	3.8	2.93
	Double positive T cell	T cell	0.24	0.38	0.54	0.8	1.29	0.42	1.25	1.29	1.22	0.09	0.05	0.7	0.16	0.4	0.33
	Exhausted CD8+ T cell	T cell	0.69	0.38	1.22	1.9	2.05	0.41	2.08	3.97	2.37	0.39	0.31	1.04	0.9	1.5	1.04
	Exhausted double negative T-cell	T cell	0.62	0.62	1.07	1.55	1.66	0.79	1.59	1.91	1.7	0.26	0.1	0.34	0.5	1.29	0.68
	Exhausted double positive T cell	T cell	0.13	0.11	0.36	0.63	0.82	0.18	0.81	1.2	0.85	0.05	0.03	0.24	0.17	0.42	0.23
	Exhausted helper T cell	T cell	1.35	1.31	2.36	2.95	3.23	2.06	3.14	2.84	3.26	0.68	0.48	1.12	1.06	2.19	1.68
	Exhausted regulatory T cell	T cell	0.5	0.3	0.94	1.42	1.35	0.42	1.28	1.55	1.6	0.36	0.23	0.2	0.67	0.96	0.74
	Helper T cell	T cell	3.18	4.69	3.96	4.03	4.71	4.13	4.49	3.01	4.21	1.66	1.14	2.4	1.68	3.68	3.03
	Immunosuppressive B cell	B cell	0.03	0.1	0.14	0.21	0.61	0.81	0.74	0.91	0.79	0.02	0.04	1.02	0.42	0.15	0.14
	Immunosuppressive CD4+ T cell	T cell	0.73	1.43	1.14	1.51	1.77	1.31	2.03	2.27	2.21	0.24	0.21	3.63	1.02	1.35	1.11
	Immunosuppressive CD8+ T cell	T cell	0.1	0.12	0.2	0.64	0.57	0.07	1.12	4.64	2.3	0.03	0.12	5.28	1.42	0.77	0.71
	Immunosuppressive double negative T cell	T cell	0.23	0.46	0.28	0.69	0.6	0.55	1.14	3.14	1.93	0.09	0.19	4.09	1.49	1.22	0.81
	Immunosuppressive double positive T cell	T cell	0.05	0.06	0.12	0.27	0.34	0.04	0.56	1.47	0.77	0.02	0.08	3.08	0.38	0.18	0.16
	Immunosuppressive macrophage Type 1	Macrophage	1.42	2.07	1.66	2.54	2.25	2.08	2.74	3.76	3.23	0.75	0.47	3.82	2.71	2.77	2.31
	Immunosuppressive macrophage Type 2	Macrophage	1.45	1.56	1.78	2.46	2.33	1.65	2.72	4.64	3.19	0.81	0.46	4.42	2.95	2.59	2.2
	Immunosuppressive macrophage Type 2 PD1+	Macrophage	0.07	0.06	0.06	0.12	0.12	0.13	0.11	0.14	0.14	0.04	0.01	0.34	0.11	0.09	0.06
	Immunosuppressive natural killer cell	Natural killer cell	0.03	0.01	0.04	0.09	0.07	0.1	0.13	0.49	0.32	0.04	0.03	0.96	0.86	0.18	0.26
	Macrophage Type 1	Macrophage	3.71	4.12	3.65	4.14	3.92	3.95	3.9	4.26	3.87	3.02	1.67	1.33	2.67	4.19	3.37
	Macrophage Type 2	Macrophage	3.24	2.88	3.43	3.88	3.81	3.52	3.63	4.45	3.73	2.93	1.91	1.1	3.04	3.81	3.2
	Macrophage Type 2 PD1+	Macrophage	0.32	0.28	0.27	0.45	0.35	0.5	0.29	0.28	0.28	0.24	0.17	0	0.07	0.35	0.21
	Regulatory T cell	T cell	1.48	2.26	2.04	2.68	2.7	1.11	2.79	3.37	3.21	0.73	0.55	2.21	1.47	1.97	1.57
	Activated regulatory T cell	T cell	0.06	0.04	0.1	0.26	0.14	0.07	0.15	0.23	0.2	0.08	0.09	0.06	0.12	0.18	0.11
	Macrophage Type 1 PD1+	Macrophage	0.22	0.26	0.19	0.34	0.22	0.33	0.2	0.43	0.21	0.11	0.05	0	0.05	0.34	0.14
	CD56+ immunosuppressing carcinoma cell	Immunosuppressing carcinoma cell	0.01	0.01	0.01	0.1	0.02	0	0.1	0	0.16	0.01	0.1	0.15	0.71	0.07	0.38
	Immunosuppressive macrophage Type 1 PD1+	Macrophage	0.03	0.05	0.04	0.1	0.07	0.02	0.07	0.13	0.12	0.03	0.01	0.13	0.03	0.11	0.04
	Exhausted double negative T cell	T cell	0.01	0.01	0.01	0.03	0.02	0	0.02	0.07	0.02	0.01	0.01	0	0	0.02	0.01
		Sample Count	351	76	392	131	405	15	299	6	218	109	15	5	25	75	111
	Supplementary Data 3: LUAD: Phenotypes per cluster, mean density_log

## Sheet: Suppl. Data 4
			Cluster
	Cell phenotype	Cell group	1	2	2	2	3	3	3	4	4	5	5	6	6	6	6
	Activated B cell	B cell	0.02	0.11	0.17	0.12	2.07	1.89	1.01	0.15	0.51	0.02	0.02	0	0.03	0.08	0.11
	Activated cytotoxic CD4+ T cell	T cell	0.62	0.13	1.01	2.56	1.43	0.19	1.82	0.75	1.89	0.55	0.15	0.09	0.37	1.01	0.89
	Activated cytotoxic CD8+ T cell	T cell	2.88	0.13	5.38	14.69	8.5	1.09	13.05	31.3	17.9	2.19	3.82	4.85	7.93	9.03	6.02
	Activated cytotoxic double negative T cell	T cell	1.07	0.29	1.51	2.79	1.92	0.59	2.72	2.94	3.92	0.73	0.16	0.73	1.44	2.38	1.65
	Activated cytotoxic double positve T cell	T cell	0.24	0.02	0.37	0.81	0.42	0.02	0.73	1.58	0.95	0.12	0.22	0.73	0.79	0.54	0.34
	Activated natural killer cell	Natural killer cell	0.45	0.22	0.54	0.53	0.53	0.17	0.38	0.08	0.56	0.38	0.52	0.13	0.21	0.47	0.51
	B cell	B cell	4.62	44.43	24.91	16.63	233.38	268.96	136.73	5.37	65.47	2.48	2	2.03	10.04	7.21	8.82
	CD56 bright natural killer cell	Natural killer cell	5.07	3.34	7.21	8.73	12.19	3.69	10.82	5.92	10.04	53.38	31.57	2.36	6.56	4.23	18.81
	CD56 dim natural killer cell	Natural killer cell	0.12	0.06	0.31	0.48	0.55	0.16	0.7	0.06	1.29	0.17	0.06	0.91	0.32	0.57	0.32
	CD56+ carcinoma cell	Carcinoma cell	20.63	3.66	9.94	28.57	17.73	1.68	13.69	0	8.1	43.57	446.24	0	3.45	0.35	67.7
	CD56- carcinoma cell	Carcinoma cell	1761.29	1097.64	1711.39	1119.56	978.44	1224.2	1095.52	1.62	477.9	2192.72	2647.92	9.1	632.44	834.39	1472.46
	CD56- immunosuppressing carcinoma cell	Immunosuppressing carcinoma cell	8.19	3.19	5.2	29.94	12.31	53.95	138.88	111.02	736.1	7.37	12.62	1019.35	1477.45	378.82	563.67
	CD8+ T cell	T cell	12.26	10.71	26.98	53.7	93.93	7.26	92.53	198.85	130.8	3.73	3.53	54.42	11.94	20.78	20.73
	Cytotoxic CD4+ T cell	T cell	0.72	1.51	1.19	1.95	1.68	0.51	2.21	0.56	2.23	0.54	0.32	0.06	0.57	1.45	1.38
	Cytotoxic CD8+ T cell	T cell	2.33	0.48	3.58	8.96	7.52	0.97	11.97	44.62	21.41	1.17	1.23	10.14	6.96	4.13	5.02
	Cytotoxic double negative T cell	T cell	4.49	4.45	5.67	8.95	7.1	4.72	10.46	12.31	13.95	1.99	0.82	1.92	4.87	9.96	8.43
	Cytotoxic double positve T cell	T cell	0.13	0.03	0.2	0.41	0.34	0.06	0.47	0.9	0.89	0.06	0.13	0.62	0.47	0.19	0.23
	CD3 T-cell	T cell	58.39	199.84	91.68	111.61	186.21	129.45	172.5	98.67	166.5	20.12	11.68	49.12	18.05	123.53	59.75
	Double positive T cell	T cell	0.84	1.03	2.33	4.07	9.4	1.05	9.61	4.65	9.58	0.27	0.27	3.34	0.61	1.1	1.46
	Exhausted CD8+ T cell	T cell	4.77	1.1	10.73	23.66	31.54	1.07	30.67	87.48	37.23	1.64	2.52	5.14	5.53	14.54	9.84
	Exhausted double negative T-cell	T cell	2.93	3.1	5.79	10.02	14.2	4.49	13.12	13.1	15.66	0.86	0.53	1.09	2.3	7.01	3.92
	Exhausted double positive T cell	T cell	0.45	0.23	1.34	2.59	4.67	0.32	4.26	4.28	4.87	0.15	0.15	0.84	0.69	1.41	0.99
	Exhausted helper T cell	T cell	10.66	7.94	30.07	48.05	83.75	19.45	68.53	25.96	83.39	3.62	3.32	6.27	7.8	22.86	17.98
	Exhausted regulatory T cell	T cell	2.3	1.65	5.41	9.12	10.78	1.29	9.64	6.41	13.89	1.71	1.27	0.76	4.05	5.31	5.36
	Helper T cell	T cell	58.53	220.28	139.24	133.91	297.22	172.15	265.77	30.43	210.79	14.4	10.75	46.49	16.48	93.94	68.46
	Immunosuppressive B cell	B cell	0.1	0.41	0.83	0.78	5.77	3.94	6.49	2.95	6.14	0.06	0.25	5.81	2.16	0.45	0.56
	Immunosuppressive CD4+ T cell	T cell	3.59	11.71	8.33	12.61	18.23	8.96	29.27	22.95	31.3	1.03	1.9	141.06	12.09	9.31	9.72
	Immunosuppressive CD8+ T cell	T cell	0.4	0.32	1.25	4.92	3.41	0.21	11.53	210.77	44.98	0.17	1.06	637.04	43.35	5.84	7.64
	Immunosuppressive double negative T cell	T cell	0.78	1.89	1.33	3.39	3.2	2.19	10.58	50.52	27.39	0.3	2.59	204.91	26.46	11.08	7.81
	Immunosuppressive double positive T cell	T cell	0.15	0.13	0.53	1.22	1.51	0.11	3.29	8.32	5.13	0.08	0.71	78.04	3.09	0.51	0.72
	Immunosuppressive macrophage Type 1	Macrophage	12.16	26.01	19.65	35.98	30.21	21.26	49.25	77.9	77	5.25	13.15	140.03	53.96	44.69	33.52
	Immunosuppressive macrophage Type 2	Macrophage	12.81	13.44	23.73	38.05	35.33	11.26	53.28	194.96	86.71	6.47	6.32	348.46	119.17	47.55	31.77
	Immunosuppressive macrophage Type 2 PD1+	Macrophage	0.16	0.11	0.17	0.33	0.37	0.34	0.35	0.31	0.45	0.1	0.05	1.49	0.45	0.19	0.16
	Immunosuppressive natural killer cell	Natural killer cell	0.07	0.03	0.13	0.28	0.23	0.22	1.13	1.09	4.64	0.06	0.17	4.58	43.43	0.49	8.24
	Macrophage Type 1	Macrophage	93.59	120.86	98.32	123.9	122.69	124.64	134	111.52	137.85	57.17	20.37	8.65	42.73	133.65	80.78
	Macrophage Type 2	Macrophage	64.32	44.08	75.82	98.3	114.42	69.67	103.88	188.54	116.5	51.21	20.46	6.41	62.06	98.13	67.52
	Macrophage Type 2 PD1+	Macrophage	0.85	0.67	0.77	1.11	1.21	1.25	0.93	0.55	0.87	0.78	0.55	0	0.19	0.85	0.67
	Regulatory T cell	T cell	9.12	19.98	20.1	35.68	41.33	5.45	50.76	45.8	74.22	3.93	4.76	26.82	16.88	15.4	14.73
	Activated regulatory T cell	T cell	0.15	0.16	0.29	0.82	0.4	0.11	0.55	0.42	0.72	0.27	0.55	0.21	0.4	0.39	0.36
	Macrophage Type 1 PD1+	Macrophage	0.56	0.67	0.51	1.02	0.62	0.8	0.63	0.87	0.72	0.3	0.1	0	0.08	0.83	0.39
	CD56+ immunosuppressing carcinoma cell	Immunosuppressing carcinoma cell	0.03	0.02	0.03	0.88	0.12	0	2.17	0	7.49	0.02	0.42	0.55	93.69	0.16	36.58
	Immunosuppressive macrophage Type 1 PD1+	Macrophage	0.06	0.11	0.11	0.25	0.22	0.09	0.22	0.21	0.44	0.07	0.07	0.43	0.13	0.22	0.12
	Exhausted double negative T cell	T cell	0.02	0.02	0.04	0.07	0.06	0	0.06	0.06	0.06	0.02	0.03	0	0	0.02	0.04
		Sample count	351	76	392	131	405	15	299	6	218	109	15	5	25	75	111
	Supplementary Data 4: LUAD: Phenotypes per cluster, mean density

## Sheet: Suppl. Data 5
			Cluster
	Cell phenotype	Cell group	1	1	1	2	2	2	3	3	4	5	6	6	7	7	7
	Activated B cell	B cell	0.02	0.02	0.08	0	0.02	0	0.13	0.19	0.3	0.14	0.12	0.03	0.05	0	0.03
	Activated cytotoxic CD4+ T cell	T cell	0.13	0.08	0.31	0.06	0.23	0	0.31	0.56	0.49	0.52	0.63	0.22	0.42	0.41	0.34
	Activated cytotoxic CD8+ T cell	T cell	0.5	0.55	1.06	0.27	0.52	0	1.53	1.6	1.33	1.12	1.83	0.62	0.72	0.31	0.79
	Activated cytotoxic double negative T cell	T cell	0.18	0.09	0.37	0.07	0.29	0	0.43	0.63	0.53	0.49	0.61	0.34	0.39	0.4	0.5
	Activated cytotoxic double positve T cell	T cell	0.03	0.05	0.12	0.02	0.06	0	0.2	0.23	0.09	0.13	0.28	0.06	0.08	0.03	0.12
	Activated natural killer cell	Natural killer cell	0.14	0.18	0.2	0.11	0.19	0	0.14	0.3	0.26	0.27	0.24	0.16	0.22	0.76	0.23
	B cell	B cell	0.68	0.71	1.35	0.43	0.99	0	2.01	2.7	3.63	2.73	2.02	1.33	1.75	2.23	1.58
	CD56 bright natural killer cell	Natural killer cell	0.92	0.95	1.07	1.01	1.15	3.71	1.13	1.52	1.52	1.47	1.28	1.29	1.27	1.66	1.28
	CD56 dim natural killer cell	Natural killer cell	0.06	0.1	0.14	0.06	0.09	0	0.26	0.3	0.22	0.2	0.25	0.08	0.09	0.11	0.14
	CD56+ carcinoma cell	Carcinoma cell	0.81	0.27	0.71	0.91	0.78	0	0.25	0.49	0.4	0.57	1.01	0.75	0.82	0.23	0.58
	CD56- carcinoma cell	Carcinoma cell	6.7	5.07	5.87	6.83	6.75	5.08	4.06	5.64	5.57	6.27	6.59	6.55	6.62	5.05	6.48
	CD56- immunosuppressing carcinoma cell	Immunosuppressing carcinoma cell	3.88	6.42	5.88	0.76	0.81	0	6.36	4.73	1.18	1.77	2.55	3.47	0.7	0.77	1.87
	CD8+ T cell	T cell	0.71	0.47	1.58	0.39	0.93	0	2.92	3.29	3.93	3.03	2.51	1.59	2	2.12	1.2
	Cytotoxic CD4+ T cell	T cell	0.14	0.13	0.26	0.08	0.24	0	0.32	0.57	0.58	0.52	0.39	0.31	0.37	0.39	0.51
	Cytotoxic CD8+ T cell	T cell	0.35	0.25	0.84	0.2	0.35	0	1.6	1.6	1.45	1.15	1.28	0.52	0.7	0.55	0.53
	Cytotoxic double negative T cell	T cell	0.54	0.44	0.87	0.39	0.76	0	1.1	1.43	1.49	1.36	1.03	1.08	1.15	1.16	1.3
	Cytotoxic double positve T cell	T cell	0.03	0.01	0.06	0.01	0.02	0	0.18	0.16	0.13	0.11	0.12	0.03	0.03	0.04	0.03
	CD3 T-cell	T cell	1.59	1.35	2.4	1.44	2.63	0	2.99	3.84	4.58	4.01	2.83	3.47	3.52	4.88	3.62
	Double positive T cell	T cell	0.05	0.01	0.18	0.02	0.09	0	0.75	0.88	1.29	0.73	0.43	0.21	0.28	0.43	0.13
	Exhausted CD8+ T cell	T cell	0.46	0.5	1.16	0.23	0.6	0	1.91	2.22	2.48	1.84	2.01	0.76	1.08	0.91	0.8
	Exhausted double negative T-cell	T cell	0.3	0.23	0.76	0.15	0.53	0	1.19	1.66	2.09	1.51	1.25	0.74	0.94	1.1	0.91
	Exhausted double positive T cell	T cell	0.05	0.06	0.24	0.02	0.08	0	0.61	0.71	0.88	0.51	0.44	0.1	0.15	0.25	0.13
	Exhausted helper T cell	T cell	0.77	0.56	1.81	0.58	1.17	0	2.6	3.08	3.47	2.88	2.63	1.33	2.07	1.36	1.72
	Exhausted regulatory T cell	T cell	0.54	0.48	1.13	0.35	0.53	0	1.13	1.63	1.52	1.49	1.45	0.57	0.7	0.14	0.99
	Helper T cell	T cell	1.49	1.05	2.48	1.17	2.56	0	3.3	4	4.67	4.16	3.05	3.04	3.56	4.12	3.36
	Immunosuppressive B cell	B cell	0.09	0.31	0.28	0.01	0.02	0	0.78	0.62	0.5	0.26	0.26	0.08	0.06	0.15	0.09
	Immunosuppressive CD4+ T cell	T cell	0.3	0.29	0.92	0.19	0.45	0	1.71	1.82	1.87	1.31	1.07	0.94	0.7	1.3	0.96
	Immunosuppressive CD8+ T cell	T cell	0.12	0.34	0.82	0.03	0.04	0	2.27	1.41	0.94	0.42	0.58	0.26	0.07	0.34	0.12
	Immunosuppressive double negative T cell	T cell	0.19	0.7	0.93	0.03	0.13	0	1.8	1.33	0.96	0.56	0.49	0.57	0.16	0.82	0.46
	Immunosuppressive double positive T cell	T cell	0.01	0.02	0.13	0	0.01	0	0.63	0.43	0.34	0.15	0.19	0.07	0.02	0.05	0.04
	Immunosuppressive macrophage Type 1	Macrophage	1.57	2.08	2.62	0.69	0.97	4.39	3.09	2.98	2.52	2.2	2.21	2.04	1.16	3.15	2.27
	Immunosuppressive macrophage Type 2	Macrophage	1.31	2.03	2.3	0.66	0.99	0	2.9	2.93	2.54	2.01	2.32	1.5	1.2	3.05	1.94
	Immunosuppressive macrophage Type 2 PD1+	Macrophage	0.05	0.09	0.09	0.06	0.05	0	0.16	0.15	0.12	0.1	0.11	0.06	0.06	0.39	0.08
	Immunosuppressive natural killer cell	Natural killer cell	0.09	1	0.36	0.05	0.04	0	0.69	0.32	0.12	0.07	0.11	0.09	0.02	0.07	0.06
	Macrophage Type 1	Macrophage	3.21	2.28	3.24	2.59	3.27	6.52	2.91	3.84	4.16	4.06	3.29	3.68	3.53	4.97	4.1
	Macrophage Type 2	Macrophage	2.79	2.81	3.1	2.51	3.27	3.71	2.84	3.83	4.11	3.86	3.27	3.22	3.46	5.3	3.85
	Macrophage Type 2 PD1+	Macrophage	0.29	0.21	0.25	0.25	0.4	0	0.15	0.34	0.41	0.41	0.24	0.37	0.35	1.23	0.49
	Regulatory T cell	T cell	1.04	0.65	1.92	0.62	1.17	0	2.46	2.99	3.3	2.79	2.2	2.06	1.86	1.72	2.38
	Activated regulatory T cell	T cell	0.09	0.23	0.12	0.03	0.1	0	0.1	0.23	0.2	0.22	0.22	0.11	0.08	0	0.17
	Macrophage Type 1 PD1+	Macrophage	0.21	0.1	0.13	0.11	0.19	0	0.07	0.24	0.29	0.27	0.13	0.22	0.18	1.3	0.24
	CD56+ immunosuppressing carcinoma cell	Immunosuppressing carcinoma cell	0.26	1.22	0.88	0.01	0.05	0	1.16	0.36	0.02	0.01	0.07	0.17	0.01	0	0.03
	Immunosuppressive macrophage Type 1 PD1+	Macrophage	0.02	0.02	0.07	0.02	0.02	0	0.16	0.12	0.1	0.06	0.08	0.04	0.03	0.13	0.09
	Exhausted double negative T cell	T cell	0	0	0.01	0.01	0.02	0	0.01	0.02	0.04	0.01	0.02	0.02	0.01	0	0.03
		sample count	95	19	145	72	173	1	80	260	86	300	148	89	102	8	81
	Supplementary Data 5: LUSC: Phenotypes per cluster, mean density_log

## Sheet: Suppl. Data 6
			Cluster
	Cell phenotype	Cell group	1	1	1	2	2	2	3	3	4	5	6	6	7	7	7
	Activated B cell	B cell	0.08	0.08	0.32	0.01	0.07	0	0.62	0.94	1.2	0.47	0.47	0.08	0.15	0	0.08
	Activated cytotoxic CD4+ T cell	T cell	0.4	0.35	1.22	0.21	0.84	0	1.39	2.6	1.99	1.97	3.27	0.91	1.44	1	1.06
	Activated cytotoxic CD8+ T cell	T cell	2.79	2.37	9.54	1.48	3.61	0	18.29	17.09	11.51	9.06	26.89	6.17	4.37	0.99	8.98
	Activated cytotoxic double negative T cell	T cell	0.52	0.2	1.53	0.26	1.22	0	2.49	2.93	2.22	1.92	3.18	1.37	1.42	1.2	2.55
	Activated cytotoxic double positve T cell	T cell	0.09	0.15	0.41	0.07	0.23	0	0.83	0.85	0.27	0.39	1.2	0.16	0.27	0.05	0.49
	Activated natural killer cell	Natural killer cell	0.4	0.4	0.64	0.32	0.44	0	0.56	1.06	0.7	0.69	0.78	0.39	0.71	0.4	0.48
	B cell	B cell	5.37	3.51	16.39	2.81	8.18	0	40.59	84.98	152.83	65.81	32.88	18.2	23.9	13.11	14.23
	CD56 bright natural killer cell	Natural killer cell	5.03	3.22	7.54	7.74	9.8	31.52	9.36	12.17	13.05	10.02	10.93	13.92	13.32	2.65	8.96
	CD56 dim natural killer cell	Natural killer cell	0.16	0.42	0.51	0.19	0.24	0	1.13	1.06	0.69	0.57	1.03	0.26	0.25	0.17	0.38
	CD56+ carcinoma cell	Carcinoma cell	26.93	0.73	36.49	41.27	17.38	0	2.22	5.23	17.47	6.79	29.08	28.66	12.38	0.2	36.97
	CD56- carcinoma cell	Carcinoma cell	2029.59	468.85	1123.01	2572.25	1892.94	126.09	285.91	940.44	782.42	1166.9	2075.86	1645.91	1744.38	174.69	1250.93
	CD56- immunosuppressing carcinoma cell	Immunosuppressing carcinoma cell	237.36	1707.82	1142.23	5.18	4.49	0	2156.25	434.5	7.87	19.19	50.17	104.73	3.03	1.3	17.49
	CD8+ T cell	T cell	4.28	2.34	17.26	2.12	5.18	0	89.59	96.13	143.75	53.18	42.72	13.33	18.94	10.66	7.78
	Cytotoxic CD4+ T cell	T cell	0.38	0.51	0.95	0.28	0.68	0	1.5	2.55	2.14	1.72	1.4	0.93	1.03	1.42	1.43
	Cytotoxic CD8+ T cell	T cell	1.27	0.69	5.6	0.76	1.32	0	19.14	14.49	12.59	7.03	9.92	2.33	3.15	3.16	2.81
	Cytotoxic double negative T cell	T cell	2.21	1.35	4.93	1.6	3.18	0	8.43	11.02	10.73	8.59	6.55	5.38	6.5	14.62	7.23
	Cytotoxic double positve T cell	T cell	0.08	0.04	0.2	0.04	0.05	0	0.77	0.53	0.42	0.29	0.35	0.08	0.11	0.06	0.07
	CD3 T-cell	T cell	14.38	9.37	38.38	14.2	35.06	0	82.32	143.81	232.28	135.19	51.43	95.95	82.61	106.11	92.65
	Double positive T cell	T cell	0.16	0.05	0.71	0.05	0.27	0	6.23	6.35	8.72	3.39	2.03	0.68	0.94	0.59	0.37
	Exhausted CD8+ T cell	T cell	2.53	3.11	10.04	1.02	3.12	0	31.79	38	37.39	20.33	30.14	4.67	6.83	1.7	7.86
	Exhausted double negative T-cell	T cell	1.08	0.9	4.06	0.59	2.01	0	11.37	15.16	19.51	10.01	8.68	3.04	4.59	1.79	4.26
	Exhausted double positive T cell	T cell	0.18	0.18	0.86	0.08	0.24	0	4.01	4.01	4.31	1.96	2.18	0.25	0.5	0.35	0.56
	Exhausted helper T cell	T cell	4.17	3.28	19.24	3.59	7.4	0	63.93	73.72	83.94	46.59	45.57	8.06	19.01	3.59	11.88
	Exhausted regulatory T cell	T cell	2.32	1.8	8.08	1.75	2.17	0	10.7	16.49	11.17	10.77	12.86	3.38	3.3	0.18	5.55
	Helper T cell	T cell	11.78	10.47	40.43	7.79	31.65	0	116.69	175.79	252.11	151.72	64.14	60.07	86.55	68.78	74.8
	Immunosuppressive B cell	B cell	0.58	2.86	1.89	0.03	0.08	0	11.36	4.83	2.71	1.24	1.3	0.29	0.23	0.19	0.33
	Immunosuppressive CD4+ T cell	T cell	1.13	1.92	6.01	0.74	1.7	0	29.36	24.44	17.47	9.16	8.17	5.19	3.09	3.58	4.56
	Immunosuppressive CD8+ T cell	T cell	0.44	1.64	6.89	0.12	0.14	0	97.52	16.89	6.86	1.96	4.58	1.14	0.22	0.98	0.51
	Immunosuppressive double negative T cell	T cell	0.73	3.17	6.94	0.15	0.37	0	32.41	13.2	5.91	2.94	3.15	2.66	0.52	2.92	1.93
	Immunosuppressive double positive T cell	T cell	0.05	0.1	0.53	0.01	0.04	0	6.71	2.6	1.55	0.51	0.96	0.2	0.07	0.04	0.15
	Immunosuppressive macrophage Type 1	Macrophage	12.18	21.67	43.96	3.91	5.05	63.05	91.02	61.88	34.69	23.41	37.62	21.91	6.89	16.31	21.58
	Immunosuppressive macrophage Type 2	Macrophage	11.61	21.3	36.33	3.94	6.33	0	75.73	62.09	40.99	22.42	40.48	14.33	7.79	24.28	22.82
	Immunosuppressive macrophage Type 2 PD1+	Macrophage	0.08	0.21	0.27	0.16	0.11	0	0.68	0.51	0.34	0.23	0.39	0.16	0.15	0.59	0.22
	Immunosuppressive natural killer cell	Natural killer cell	0.31	28.54	4.29	0.12	0.07	0	11.83	2.3	0.37	0.18	0.44	0.32	0.03	0.12	0.13
	Macrophage Type 1	Macrophage	59.46	19.77	71.18	39.34	61.59	535.9	66.12	122.59	141.27	122.48	78.41	89.63	84.45	92.44	104.09
	Macrophage Type 2	Macrophage	43.85	35.68	67.25	39.49	62.25	31.52	60.96	122.23	149.18	103.7	76.18	56.07	77.07	129.86	90.08
	Macrophage Type 2 PD1+	Macrophage	0.79	0.55	0.87	0.67	1.06	0	0.55	1.08	1.21	1.12	0.75	1.08	1.08	2.84	1.68
	Regulatory T cell	T cell	6.15	2.53	19.73	3.64	5.9	0	54.51	65.23	71.21	39.02	29.6	18.44	15.82	4.43	24.35
	Activated regulatory T cell	T cell	0.27	0.66	0.4	0.1	0.36	0	0.37	0.78	0.57	0.63	0.79	0.46	0.23	0	0.64
	Macrophage Type 1 PD1+	Macrophage	0.55	0.21	0.43	0.33	0.45	0	0.27	0.77	0.7	0.76	0.44	0.54	0.45	2.77	0.51
	CD56+ immunosuppressing carcinoma cell	Immunosuppressing carcinoma cell	5.01	21.38	41.84	0.04	0.21	0	42	10.29	0.11	0.05	0.42	1.57	0.02	0	0.17
	Immunosuppressive macrophage Type 1 PD1+	Macrophage	0.06	0.08	0.21	0.08	0.05	0	0.77	0.42	0.24	0.14	0.29	0.08	0.06	0.15	0.18
	Exhausted double negative T cell	T cell	0.01	0	0.04	0.02	0.04	0	0.05	0.07	0.09	0.04	0.06	0.06	0.03	0	0.05
		sample count	95	19	145	72	173	1	80	260	86	300	148	89	102	8	81
	Supplementary Data 6: LUSC: Phenotypes per cluster, mean density

## Sheet: Suppl. Data 7
		Berlin				Cologne
		LUAD		LUSC		LUAD		LUSC
	Characteristic	No.	%	No.	%	No.	%	No.	%	P-value
	BRAF
	WT	65	0.2	85	0.261538	75	0.230769	88	0.270769	0.71
	Mutated	4	0.0123077	2	0.00615385	3	0.00923077	3	0.00923077
	CTNNB1
	WT	68	0.209231	86	0.264615	74	0.227692	88	0.270769	0.392
	Mutated	1	0.00307692	1	0.00307692	4	0.0123077	3	0.00923077
	DDR2
	WT	69	0.212308	87	0.267692	74	0.227692	87	0.267692	0.053
	Mutated	0	0	0	0	4	0.0123077	4	0.0123077
	EGFR
	WT	60	0.184615	84	0.258462	67	0.206154	87	0.267692	0.019*
	Mutated	9	0.0276923	3	0.00923077	11	0.0338462	4	0.0123077
	ERBB2
	WT	68	0.209231	85	0.261538	78	0.24	91	0.28	0.31
	Mutated	1	0.00307692	2	0.00615385	0	0	0	0
	FGFR1
	WT	69	0.212308	86	0.264615	76	0.233846	89	0.273846	0.579
	Mutated	0	0	1	0.00307692	2	0.00615385	2	0.00615385
	FGFR2
	WT	68	0.209231	86	0.264615	77	0.236923	90	0.276923	0.997
	Mutated	1	0.00307692	1	0.00307692	1	0.00307692	1	0.00307692
	FGFR3
	WT	69	0.212308	87	0.267692	77	0.236923	88	0.270769	0.162
	Mutated	0	0	0	0	1	0.00307692	3	0.00923077
	IDH1
	WT	69	0.212308	87	0.267692	77	0.236923	90	0.276923	0.598
	Mutated	0	0	0	0	1	0.00307692	1	0.00307692
	KEAP1
	WT	69	0.212308	87	0.267692	74	0.227692	89	0.273846	0.054
	Mutated	0	0	0	0	4	0.0123077	2	0.00615385
	KRAS
	WT	53	0.163077	86	0.264615	46	0.141538	85	0.261538	3.352E-12****
	Mutated	16	0.0492308	1	0.00307692	32	0.0984615	6	0.0184615
	MAP2K1
	WT	68	0.209231	87	0.267692	78	0.24	90	0.276923	0.541
	Mutated	1	0.00307692	0	0	0	0	1	0.00307692
	MET
	WT	69	0.212308	85	0.261538	77	0.236923	91	0.28	0.334
	Mutated	0	0	2	0.00615385	1	0.00307692	0	0
	NRAS
	WT	67	0.206154	86	0.264615	77	0.236923	90	0.276923	0.782
	Mutated	2	0.00615385	1	0.00307692	1	0.00307692	1	0.00307692
	PIK3CA
	WT	68	0.209231	82	0.252308	72	0.221538	86	0.264615	0.391
	Mutated	1	0.00307692	5	0.0153846	6	0.0184615	5	0.0153846
	PTEN
	WT	68	0.209231	76	0.233846	76	0.233846	83	0.255385	0.014*
	Mutated	1	0.00307692	11	0.0338462	2	0.00615385	8	0.0246154
	STK11
	WT	62	0.190769	87	0.267692	77	0.236923	91	0.28	6.811E-05****
	Mutated	7	0.0215385	0	0	1	0.00307692	0	0
	TP53
	WT	47	0.144615	49	0.150769	42	0.129231	25	0.0769231	1.863E-06****
	Mutated	22	0.0676923	38	0.116923	36	0.110769	66	0.203077
	Supplementary Data 7: Mutational landscape of the lung cohort.
	Statistical analysis was performed using two-sided Chi-Square tests.
	BRAF, B-Raf proto-oncogene; CTNNB1, catenin beta-1; DDR2, discoidin domain receptor tyrosine kinase 2; EGFR, epidermal growth factor receptor; ERBB2, Erb-B2 receptor tyrosine kinase 2;
	FGFR1, fibroblast growth factor receptor 1; FGFR2, fibroblast growth factor receptor 2; FGFR3, fibroblast growth factor receptor 3; IDH1, isocitrate dehydrogenase 1; KEAP1, Kelch-like ECH-associated protein 1;
	KRAS, Kirsten rat sarcoma viral oncogene; LUAD, lung adenocarcinoma; LUSC, lung squamous cell carcinoma; MAP2K1, mitogen-activated protein kinase kinase 1; MET, MET proto-oncogene;
	NRAS, neuroblastoma RAS viral oncogene homolog; PIK3CA, phosphatidylinositol-4,5-bisphosphate 3-kinase catalytic subunit alpha; PTEN, phosphatase and tensin homolog;
	STK11, serine/threonine kinase 11; TP53, tumor protein p53; WT, wild type.
	* = p < 0.05; ** = p < 0.01; *** = p < 0.001; **** = p < 0.0001.
